# Supplementary material for: MOF-modified C3N4 for efficient photo-induced removal of uranium under air without sacrificial agents
Source: Royal Society of Chemistry journal article supplement (doi:10.1039/d3ta07710a), 2024-01-01
Supplement: d3ta07710a1.pdf [file d3ta07710a1.pdf]

## Supporting Information

# MOF modified C<sub>3</sub>N<sub>4</sub> for efficient photo-induced removal of uranium under air without sacrificial agents

*Lingyu Zhang<sup>a</sup>, Yuhao Yang<sup>a</sup>, Nan Zhao<sup>a</sup>, Shuang Liu<sup>c</sup>, Zhe Wang<sup>a,b\*</sup>, Xiangke Wang<sup>a</sup>,  
Yuexiang Lu<sup>b\*</sup>*

<sup>a</sup> College of Environmental Science and Engineering, North China Electric Power University, Beijing 102206, China

<sup>b</sup> Institute of Nuclear and New Energy Technology, Tsinghua University, Beijing 100084, China

<sup>c</sup> Nuclear Research Institute for Future Technology and Policy, Seoul National University, Seoul 08826, Republic of Korea

Corresponding Authors

\*Zhe Wang, E-mail: wang2023@tsinghua.edu.cn

\*Yuexiang Lu, E-mail: luyuexiang@mail.tsinghua.edu.cn

## Characterization

The photocatalysts were characterized by SEM, XPS, XRD, BET, PL, FT-IR. The morphology of samples was observed with scanning electron microscopy (ZEISS Gemini SEM 360). X-ray photoelectron spectroscopy (XPS) measurements were performed on the PHI Quantro SXM, ULVAC-PHI, Japan. X-ray diffraction (XRD) measurements were performed using the Rigaku Corporation. Brunauer-Emmett-Teller (BET) surface areas of samples were measured by means of N<sub>2</sub> adsorption over the Trista II. Fluorescence spectroscopy of samples were measured by Perkin Elmer LS 55. Fourier Transform Infrared Spectroscopy (FTIR, IRTracer-100, Japan) was used to investigate the stability of the samples in the range of 500-4000 cm<sup>-1</sup>.

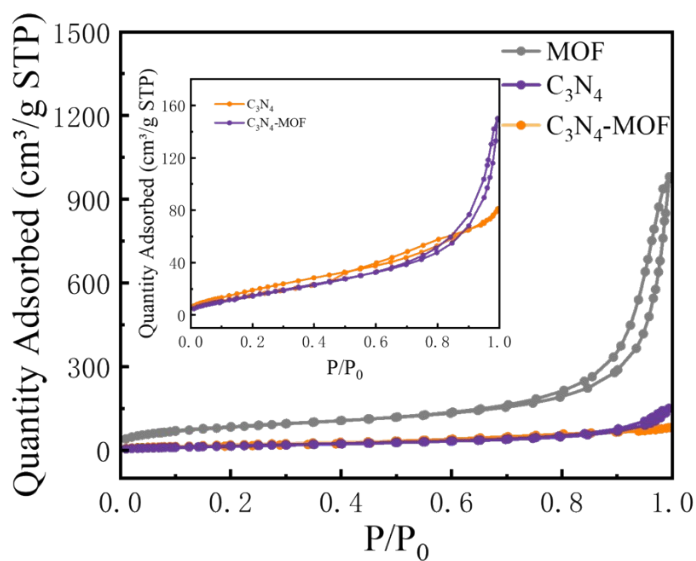

**Fig. S1** Nitrogen adsorption-desorption isotherms of synthesized materials.

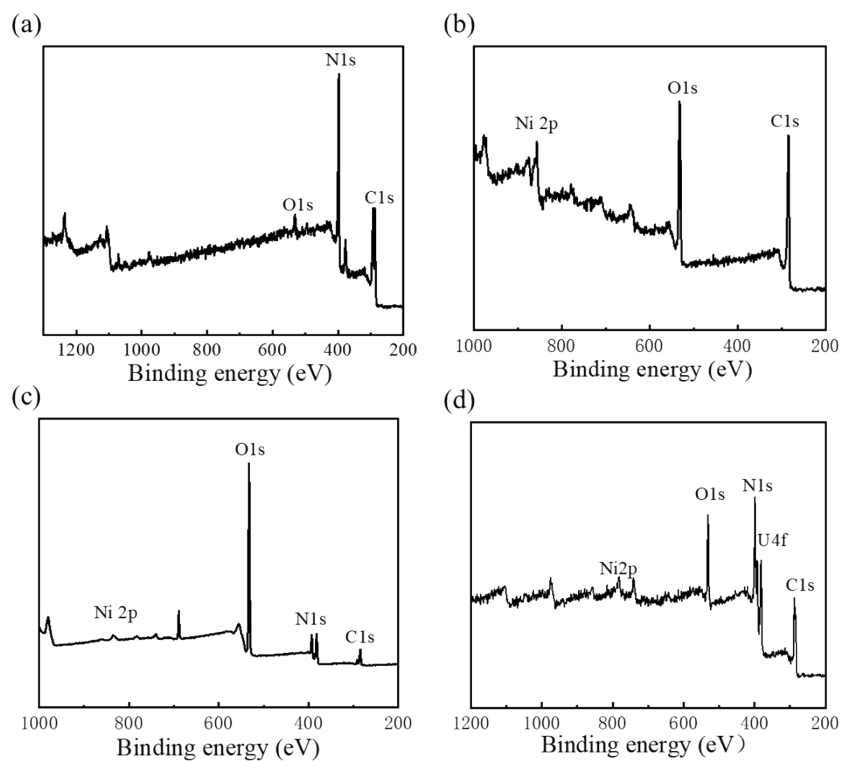

**Fig. S2** XPS survey spectrum of (a)  $C_3N_4$ , (b) MOF, (c)  $C_3N_4$ -MOF and (d)  $C_3N_4$ -MOF after the photocatalytic removal of uranium.

**Table S1.** The atomic ratios of C, N, O, Ni and U elements in materials obtain from XPS.

| Sample<br>Element | $C_3N_4$ | MOF    | $C_3N_4$ -MOF | $C_3N_4$ -MOF (photocatalytic) |
|-------------------|----------|--------|---------------|--------------------------------|
| C                 | 56.31%   | 63.77% | 52.53%        | 47.5%                          |
| N                 | 39.31%   | 1.87%  | 30.43%        | 32.14%                         |
| Ni                |          | 5.21%  | 3.28%         | 1.48%                          |
| O                 | 4.38%    | 29.15% | 13.75%        | 17.38%                         |
| U                 |          |        |               | 1.5%                           |

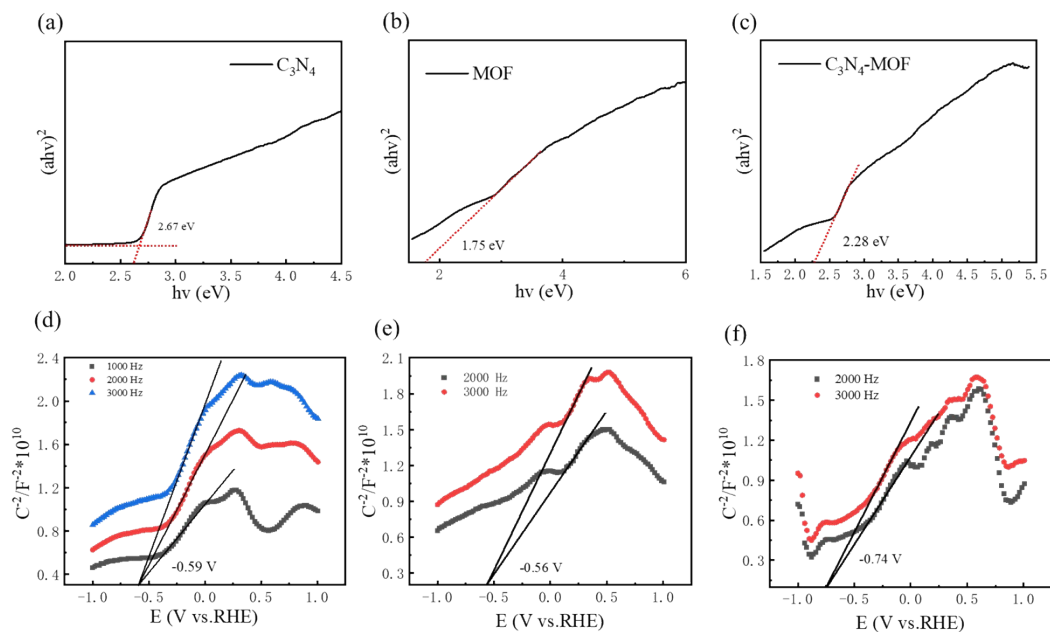

**Fig. S3** Band gap calculated derived from the UV-Vis absorption spectrum of (a)  $C_3N_4$ , (b) MOF, (c)  $C_3N_4$ -MOF. Mott-Schottky plots of (d)  $C_3N_4$ , (e) MOF, (f)  $C_3N_4$ -MOF.

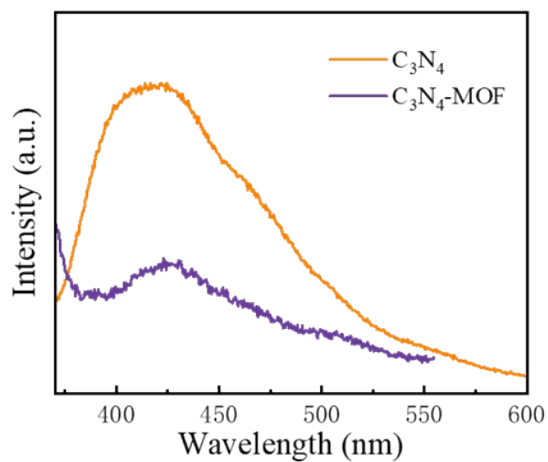

**Fig. S4** The PL spectra of  $C_3N_4$  and  $C_3N_4$ -MOF with an excitation wavelength of 380 nm.

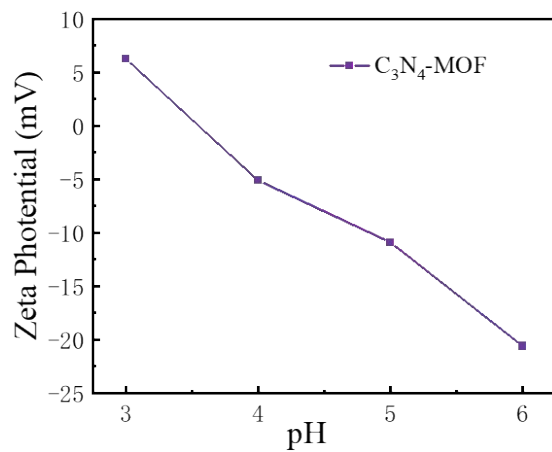

**Fig. S5** The zeta potential of C<sub>3</sub>N<sub>4</sub>-MOF under different pHs.

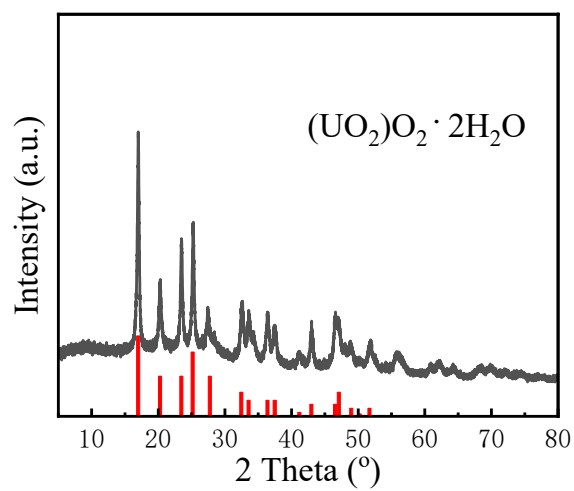

**Fig. S6** XRD patterns of C<sub>3</sub>N<sub>4</sub>-MOF after the photocatalytic reaction under N<sub>2</sub> atmosphere.
